# Supplementary material
Source: PubMed Central journal article supplement (PMC7712491)
Supplement: NIHMS1648654-supplement-Supp.pdf [file NIHMS1648654-supplement-Supp.pdf]

**Appendix A.** Predictors used in all the different models.

**Predictors in Model A1:**

AGE\_DX, YEAR\_DX, GENDER, STAGE, RACEHISP, MARRIED, INSURANCE, CIGARETTE, TRT\_SURGERY, TRT\_RADIATION, TRT\_CHEMO, TRT\_HORMONE

**Predictors in Model A2:**

Predictors in A1 + FL\_RPL\_1, FL\_RPL\_2, FL\_RPL\_3, FL\_RPL\_4, RUCA, AVGSMK, AVGHALC, AVGPLTH, PCPRATE

**Predictors in Model A3:**

For Breast cancer: Predictors in A2 + RACEHISP\*INSURANCE

For Lung cancer: Predictors in A2 + RACEHISP\*STAGE, RACEHISP\*MARRIED, RACEHISP\*FL\_RPL\_1

For Colon cancer: Predictors in A2 + RACEHISP\*STAGE, RACEHISP\*MARRIED

**Base predictors in Model B and C**

AGE\_DX, YEAR\_DX, GENDER, STAGE, RACEHISP, MARRIED, INSURANCE, CIGARETTE, TRT\_SURGERY, TRT\_RADIATION, TRT\_CHEMO, TRT\_HORMONE

**For Model B1:** Base predictors + RUCA\_B1

**For Model B2:** Base predictors + RUCA\_B2

**For Model B3:** Base predictors + RUCA\_B3

**For Model B4:** Base predictors + RUCA\_B4

**For Model C1:** Base predictors + NCHS\_C1

**Appendix B.** Hazard ratios from the cox models under scenario A.

| Predictors                   | Breast               | Lung              | Colorectal        |
|------------------------------|----------------------|-------------------|-------------------|
| <b>Age at diagnosis</b>      | 1.20 (1.15, 1.26)    | 1.17 (1.14, 1.19) | 1.24 (1.19, 1.28) |
| <b>Year of diagnosis</b>     | 1.02 (1.01, 1.03)    | 1.00 (1.00, 1.01) | 1.03 (1.02, 1.04) |
| <b>Sex (Male vs. Female)</b> |                      | 1.21 (1.17, 1.25) | 1.12 (1.04, 1.21) |
| <b>Stage of diagnosis</b>    |                      |                   |                   |
| Reginal vs. Local            | 4.35 (3.84, 4.93)    |                   |                   |
| Distant vs. Local            | 17.17 (14.73, 20.03) |                   |                   |
| Unknown vs. Local            | 5.83 (4.97, 6.85)    |                   |                   |

|                                   |                   |                   |                   |
|-----------------------------------|-------------------|-------------------|-------------------|
| <b>Race-ethnicity</b>             |                   |                   |                   |
| NHB vs. NHW                       |                   |                   |                   |
| Hispanics vs. NHW                 |                   |                   |                   |
| <b>Marital status</b>             |                   |                   |                   |
| Married vs. Single                | 0.79 (0.72, 0.87) |                   |                   |
| Unknown vs. Single                | 0.59 (0.46, 0.76) |                   |                   |
| <b>Insurance</b>                  |                   |                   |                   |
| Private vs. None                  |                   | 0.74 (0.67, 0.83) | 0.69 (0.54, 0.87) |
| Medicaid vs. None                 |                   | 0.88 (0.79, 0.99) | 1.03 (0.79, 1.33) |
| Medicare vs. None                 |                   | 0.74 (0.67, 0.83) | 0.75 (0.60, 0.94) |
| Medicare with supplement vs. None |                   | 0.68 (0.62, 0.76) | 0.69 (0.55, 0.86) |
| Other vs. None                    |                   | 0.79 (0.71, 0.87) | 0.88 (0.70, 1.12) |
| Unknown vs. None                  |                   | 1.49 (1.35, 1.66) | 1.43 (1.14, 1.81) |
| <b>Smoking status</b>             |                   |                   |                   |
| Former vs. Never                  | 0.78 (0.68, 0.91) | 1.21 (1.13, 1.30) | 0.98 (0.89, 1.08) |
| Current vs. Never                 | 1.27 (1.10, 1.46) | 1.37 (1.27, 1.46) | 1.13 (1.00, 1.28) |
| Unknown vs. Never                 | 1.38 (1.24, 1.54) | 1.48 (1.38, 1.58) | 1.16 (1.06, 1.28) |
| <b>Treatment: Surgery</b>         | 0.41 (0.37, 0.47) | 0.44 (0.42, 0.47) | 0.46 (0.42, 0.51) |
| <b>Treatment: Radiation</b>       | 0.83 (0.74, 0.94) | 0.93 (0.90, 0.96) | 0.88 (0.71, 1.08) |
| <b>Treatment: Chemo therapy</b>   | 1.27 (1.14, 1.42) | 0.80 (0.77, 0.83) | 0.90 (0.82, 0.98) |
| <b>Treatment: Hormone therapy</b> | 0.71 (0.61, 0.81) | 0.79 (0.61, 1.04) | 0.15 (0.04, 0.61) |
| <b>SVI: Socioeconomic status</b>  | 1.01 (0.99, 1.04) |                   | 1.01 (0.99, 1.03) |
| <b>SVI: Household composition</b> | 0.99 (0.97, 1.01) | 0.99 (0.98, 1.00) | 1.00 (0.98, 1.02) |

|                                          |                   |                   |                   |
|------------------------------------------|-------------------|-------------------|-------------------|
| <b>and disability</b>                    |                   |                   |                   |
| <b>SVI: Minority status and language</b> | 1.02 (0.99, 1.05) | 1.00 (0.99, 1.01) | 0.99 (0.96, 1.01) |
| <b>SVI: Housing and transportation</b>   | 1.02 (1.00, 1.04) | 1.00 (0.99, 1.01) | 1.03 (1.01, 1.05) |
| <b>Rurality</b>                          |                   |                   |                   |
| Urban vs. Rural                          | 0.94 (0.82, 1.07) | 1.01 (0.96, 1.06) | 1.05 (0.94, 1.17) |
| Suburban vs. Rural                       | 1.32 (1.11, 1.56) | 1.13 (1.07, 1.20) | 1.23 (1.07, 1.41) |
| Micropolitan vs. Rural                   | 0.99 (0.82, 1.21) | 1.16 (1.08, 1.24) | 1.13 (0.97, 1.32) |
| Small town vs. Rural                     | 1.14 (0.91, 1.42) | 1.20 (1.11, 1.31) | 1.35 (1.13, 1.62) |
| <b>County smoking rate</b>               | 1.04 (0.88, 1.23) | 1.12 (1.05, 1.19) | 1.25 (1.09, 1.43) |
| <b>County alcohol consumption rate</b>   | 0.56 (0.25, 1.24) | 0.99 (0.75, 1.30) | 1.43 (0.75, 2.72) |
| <b>County health status</b>              | 0.97 (0.95, 0.99) | 0.98 (0.98, 0.99) | 0.97 (0.95, 0.99) |
| <b>County PCP density</b>                | 1.00 (0.98, 1.02) | 1.01 (1.00, 1.02) | 1.02 (1.00, 1.04) |
|                                          |                   |                   |                   |
| <b>Race by Insurance</b>                 |                   |                   |                   |
| Not insured, NHB vs. NHW                 | 2.27 (1.45, 3.57) |                   |                   |
| Not insured, Hispanics vs. NHW           | 0.25 (0.09, 0.68) |                   |                   |
| Private, NHB vs. NHW                     | 1.47 (1.10, 1.96) |                   |                   |
| Medicaid, NHB vs. NHW                    | 2.00 (1.47, 2.78) |                   |                   |
| Other, NHB vs. NHW                       | 2.17 (1.61, 3.03) |                   |                   |
| <b>Race by Stage</b>                     |                   |                   |                   |
| Local, NHB vs NHW                        |                   | 1.31 (1.00, 1.73) | 1.12 (0.77, 1.62) |
| Regional, NHB vs NHW                     |                   | 0.99 (0.79, 1.24) | 1.24 (1.00, 1.53) |

|                                          |  |                   |                   |
|------------------------------------------|--|-------------------|-------------------|
| Distance, NHB vs NHW                     |  | 1.09 (0.90, 1.33) | 0.77 (0.64, 0.92) |
| Race by Marital status                   |  |                   |                   |
| Single, NHB vs NHW                       |  | 1.31 (1.00, 1.73) | 1.12 (0.77, 1.62) |
| Married, NHB vs NHW                      |  | 0.99 (0.79, 1.24) | 1.24 (1.00, 1.53) |
| Unknown, NHB vs NHW                      |  | 0.52 (0.29, 0.94) | 1.03 (0.39, 2.72) |
| <b>SVI: Socioeconomic status by Race</b> |  |                   |                   |
| NHW                                      |  | 1.02 (1.01, 1.03) |                   |
| NHB                                      |  | 0.99 (0.97, 1.02) |                   |
| Hispanics                                |  | 1.03 (0.97, 1.09) |                   |
